# Supplementary material for: Sharing for science: high-resolution trophic interactions revealed rapidly by social media
Source: PeerJ. 2020 Jul 9;8:e9485. doi: 10.7717/peerj.9485 (PMC7354841; doi:10.7717/peerj.9485)
Supplement: Supplemental Information 1 [file peerj-08-9485-s001.xlsx]

## Sheet: DietRefs
Database Ref	Author(s)	TempKey1	TempKey2	Keyword	Title	Source	Publication Year	Medium	Afrotyphlops bibronii	Afrotyphlops fornasinii	Afrotyphlops mucruso	Afrotyphlops obtusus	Afrotyphlops schlegelii	Amblyodipsas concolor	Amblyodipsas microphthalma	Amblyodipsas polylepis	Amblyodipsas ventrimaculata	Amplorhinus multimaculatus	Aparallactus capensis	Aparallactus lunulatus	Aspidelaps lubricus	Aspidelaps scutatus	Atractaspis bibronii	Atractaspis congica	Atractaspis duerdeni	Bitis arietans	Bitis atropos	Bitis caudalis	Bitis gabonica	Bitis schneideri	Boaedon capensis	Causus defilippii	Causus rhombeatus	Chilorhinophis gerardi	Crotaphopeltis barotseensis	Crotaphopeltis hotamboeia	Dasypeltis medici	Dasypeltis scabra	Dendroaspis angusticeps	Dendroaspis polylepis	Dipsadoboa aulica	Dipsadoboa shrevei	Dipsina multimaculata	Dispholidus typus	Duberria variegata	Elapsoidea boulengeri	Elapsoidea sundevallii	Gracililima nyassae	Hemachatus haemachatus
Alexander & Marais 2007	Alexander, G. J. and Marais, J.	Alexander&Marais2007	AlexanderMarais2007	AlexanderMarais2007	A guide to the reptiles of southern Africa	Struik Publishers. Cape Town.	2007	Book
Alexander 2012	Alexander, G. J.	Alexander2012	Alexander2012	Alexander2012	Natural History Notes: Python natalensis (Smith, 1840) predation/diet	African Herp News	2012	Herp. Society Bulletin
Barbour & Loveridge 1928	Barbour, T. and Loveridge, A.	Barbour&Loveridge1928	BarbourLoveridge1928	BarbourLoveridge1928	A comparative study of the herpetological fauna of the Uluguru and Usambara Mountains, Tanganyuka Territory with descriptions of new species	Bulletin of the Museum of Comparative Zoology at Harvard College	1928	Museum Publication															X
Bates & Douglas 1993	Bates, M. F. and Douglas, R. M.	Bates&Douglas1993	BatesDouglas1993	BatesDouglas1993	Life History Notes: Lamprophis aurora diet	Journal of the Herpetological Association of Africa	1993	Journal
Bates & Little 2013	Bates, M. F. and Little, L. T.	Bates&Little2013	BatesLittle2013	BatesLittle2013	Predation on the eggs of ground-nesting birds by Dasypeltis scabra (Linnaeus, 1758) in the moist highland grasslands of South Africa	Journal of the Herpetological Association of Africa	2013	Journal																														X
Bates & Nuttall 2013	Bates, M. F. and Nuttall, R.	Bates&Nuttall2013	BatesNuttall2013	BatesNuttall2013	Natural History Notes: Dispholidus typus viridis (A. Smith, 1828) diet	African Herp News	2013	Herp. Society Bulletin																																				X
Bates 1992	Bates, M. F.	Bates1992	Bates1992	Bates1992	Life History Notes: Elapsoidea sundevallii media diet	Journal of the Herpetological Association of Africa	1992	Journal																																							X
Bates 1994	Bates, M. F.	Bates1994	Bates1994	Bates1994	The Cape Wolf snake: a specialised lizard-eater	Culna	1994	Museum Publication
Bates et al. 2010	Bates, M. F.	Batesetal.2010	Batesetal.2010	Bates2010	Natural History Notes: Psammophis notostictus (Peters, 1867) diet	African Herp News	2010	Herp. Society Bulletin
Bates et al. 2009	Bates, M. F., Anderson, W. M., and Bourquin, S.	Batesetal.2009	Batesetal.2009	Bates2009	Amblyodipsas p. polylepis (Bocage, 1873)	African Herp News	2009	Herp. Society Bulletin								X
Bogert 1940	Bogert, C. M.	Bogert1940	Bogert1940	Bogert1940	Herpetological results of the Vernay Angola Expedition	American Museum Natural History	1940	Museum Publication														X
Boulenger 1888	Boulenger, G. A.	Boulenger1888	Boulenger1888	Boulenger1888	On new or little-known South African reptiles	The Annals and Magazine of Natural History: Zoology, Botany and Geology	1888	Journal
Boycott 1985	Boycott, R.	Boycott1985	Boycott1985	Boycott1985	An additional observation of the Spotted Bush Snake (Philothamnus semivariegatus) from Namaqualand	Journal of the Herpetological Association of Africa	1985	Journal
Boycott 1995	Boycott, R.	Boycott1995	Boycott1995	Boycott1995	Notes on the distribution and ecology of Amblyodipsas concolar (A. Smith, 1849) in Swaziland (Serpentes: Colubridae)	African Journal of Ecology	1995	Journal						X
Boycott 2018	Boycott, R.	Boycott2018	Boycott2018	Boycott2018	Natural History Notes: Psammophis brevirostris diet	African Herp News	2018	Herp. Society Bulletin
Braack & Maguire 2005	Braack, H. H. and Maguire, R. L.	Braack&Maguire2005	BraackMaguire2005	BraackMaguire2005	Natural History Notes: Dipsadoboa aulica (Gunther, 1864) feeding	African Herp News	2005	Herp. Society Bulletin																																	X
Braack & Maguire 2005	Braack, H. H. and Maguire, R. L.	Braack&Maguire2005	BraackMaguire2005	BraackMaguire2005	Natural History Notes: Crotaphopeltis hotamboeia (Laurenti, 1768) feeding	African Herp News	2005	Herp. Society Bulletin																												X
Branch & Bauer 1995	Branch, W. R. and Bauer, A. M.	Branch&Bauer1995	BranchBauer1995	BranchBauer1995	Herpetofauna of the little Karoo, Western Cape, South Africa with notes on life history and taxonomy	Herpetological Natural History	1995	Herp. Society Bulletin										X
Branch & Braack 1987	Branch, W. R. and Braack, H. H.	Branch&Braack1987	BranchBraack1987	BranchBraack1987	Reptiles and Amphibians of the Addo Elephant National Park	Koedoe	1987	Journal																							X					X
Branch & Burger 1991	Branch, W. R. and Burger, M.	Branch&Burger1991	BranchBurger1991	BranchBurger1991	Life History Notes: Lamprophis guttatus, spotted house snake diet	Journal of the Herpetological Association of Africa	1991	Journal
Branch & Haacke 1980	Branch, W. R. and Haacke, W. D.	Branch&Haacke1980	BranchHaacke1980	BranchHaacke1980	A fatal attack on a young boy by an African Rock Python, Python sebae	Journal of Herpetology	1980	Journal
Branch & Haagner 1999	Branch, W. R. and Haagner, G. V.	Branch&Haagner1999	BranchHaagner1999	BranchHaagner1999	Geographical Distribution: Psammophis brevirostris and Acontias sp: the value of road kills	African Herp News	1999	Herp. Society Bulletin
Branch 1976	Branch, W. R.	Branch1976	Branch1976	Branch1976	The Wolf Snakes Lycophidion capense and Lycophidion variegatum (Reptilia, Serpentes, Colubridae) in South Africa	Journal of Herpetology	1976	Journal
Branch 1979	Branch, W. R.	Branch1979	Branch1979	Branch1979	The venomous snakes of southern Africa Part 2. Elapidae and Hydrophidae.	The Snake	1979	Herp. Society Bulletin																																							X
Branch 1988	Branch, W. R.	Branch1988	Branch1988	Branch1988	South African Red Data Book - Reptiles and Amphibians	CSIR, Pretoria	1988	Book																					X
Branch 1991	Branch, W. R.	Branch1991	Branch1991	Branch1991	Unusual herpetological observations in the Kruger National Park	African Herp News	1991	Herp. Society Bulletin																																X
Branch 2005	Branch, W. R.	Branch2005	Branch2005	Branch2005	Natural History Notes: Mehelya nyassae (Gunther, 1888) diet	African Herp News	2005	Herp. Society Bulletin																																								X
Branch et al. 1993	Branch, W. R., Haagner, G. V., and Hall, R.	Branchetal.1993	Branchetal.1993	Branch1993	Life History Notes: Naja nivea diet	Journal of the Herpetological Association of Africa	1993	Journal
Branch et al. 1995	Branch, W. R., Haagner, G. V. and Shine, R.	Branchetal.1995	Branchetal.1995	Branch1995	Is there an ontogenetic shift in mamba diet? Taxonomic confusion and dietary records for black and green mambas (Dendroaspis: Elapidae)	Herpetological Natural History	1995	Herp. Society Bulletin																															X	X
Branch et al. 1997	Branch, W. R., Shine, R., Harlow, P. S., and Webb, J. K.	Branchetal.1997	Branchetal.1997	Branch1997	Sexual dimorphism, diet and reproduction of the western keeled snake, Pythonodipsas carinata (Serpentes: Colubridae)	African Journal of Herpetology	1997	Journal
Broadley & Hughes 2000	Broadley, D. G. and Hughes B.	Broadley&Hughes2000	BroadleyHughes2000	BroadleyHughes2000	A revision of the African genus Hemirhagerrhis Boettger 1893 (Serpentes: Colubridae)	Natural History Museum of Zimbabwe (Syntarus)	2000	Museum Publication
Broadley 1958	Broadley, D. G.	Broadley1958	Broadley1958	Broadley1958	Feeding habits of Calamelaps and Aparallactus	Journal of the Herpetological Association of Rhodesia	1958	Journal											X
Broadley 1959	Broadley, D. G.	Broadley1959	Broadley1959	Broadley1959	The Herpetology of the Southern Rhodesia Part 1. Snakes	Bulletin of the Museum of Comparative Zoology	1959	Museum Publication								X							X			X										X								X
Broadley 1961	Broadley, D. G.	Broadley1961	Broadley1961	Broadley1961	Reptiles as predators--an appeal for information	Journal of the Herpetological Association of Rhodesia	1961	Journal
Broadley 1963	Broadley, D. G.	Broadley1963	Broadley1963	Broadley1963	A note on the ecology of Atractaspis bibronii	Journal of the Herpetological Association of Rhodesia	1963	Journal															X
Broadley 1963	Broadley, D. G.	Broadley1963	Broadley1963	Broadley1963	Two rare fossorial reptiles in south-eastern Rhodesia–predator and prey	Journal of the Herpetological Association of Rhodesia	1963	Journal									X
Broadley 1966	Broadley, D. G.	Broadley1966	Broadley1966	Broadley1966	The Herpetology of South-East Africa	Department of Zoology, University of Natal, Durban, South Africa	1966	Unpublished Dissertation								X	X		X			X	X	X		X	X		X		X	X		X		X			X	X		X		X				X	X
Broadley 1967	Broadley, D. G.	Broadley1967	Broadley1967	Broadley1967	An expedition to the south-western Kalahari, January–March 1967	The Journal of Herpetological Association of Africa	1967	Journal																				X			X
Broadley 1968	Broadley, D. G.	Broadley1968	Broadley1968	Broadley1968	A revision of Aspidelaps scutatus (A. Smith) (Serpentes: Elapinae)	Arnoldia (Rhodesia)	1968	Museum Publication														X
Broadley 1969	Broadley, D. G.	Broadley1969	Broadley1969	Broadley1969	A new species of Lycophidion from Rhodesia (Serpentes: Colubridae)	Arnoldia (Rhodesia)	1969	Museum Publication
Broadley 1971	Broadley, D. G.	Broadley1971	Broadley1971	Broadley1971	A revision of the African snake genera Amblyodipsas and Xenocalamus	Occasional Papers of the National Museums of Rhodesia Series B	1971	Museum Publication							X	X	X
Broadley 1972	Broadley, D. G.	Broadley1972	Broadley1972	Broadley1972	A review of the Nucras tessellata group (Sauria: Lacertidae)	Arnoldia (Rhodesia)	1972	Museum Publication																				X
Broadley 1972	Broadley, D. G.	Broadley1972	Broadley1972	Broadley1972	The Horned Viper Bitis caudalis (A. Smith) in the Central Kalahari	Botswana Notes and Records	1972	Society Bulletin																				X
Broadley 1974	Broadley, D. G.	Broadley1974	Broadley1974	Broadley1974	Ophiophagy in Bitis arietans in Zambia	Journal of the Herpetological Association of Africa	1974	Journal																		X
Broadley 1977	Broadley, D. G.	Broadley1977	Broadley1977	Broadley1977	A revision of the African snakes of the genus Psammophylax Fitzinger (Colubridae)	Occasional Papers of the National Museums of Rhodesia Series B	1977	Museum Publication
Broadley 1979	Broadley, D. G.	Broadley1979	Broadley1979	Broadley1979	Predation on reptile eggs by African snakes of the genus Prosymna	Herpetologica	1979	Journal
Broadley 1983	Broadley, D. G.	Broadley1983	Broadley1983	Broadley1983	FitzSimons’ Snakes of Southern Africa	Jonathon Ball and Ad. Donker Publishers	1983	Book																			X			X			X		X											X	X
Broadley 1983; Bates 2018	Broadley, D. G.; Bates M. F.	Broadley1983;Bates2018	Broadley1983;Bates2018	Broadley1983;Bates2018	FitzSimons’ Snakes of Southern Africa; Natural History Notes: Lamprophis fiskii (Fisk’s Snake) Diet. Herpetological Review 49(1): 132–133.	Jonathon Ball and Ad. Donker Publishers	1983; 2018	Book
Broadley 1988	Broadley, D. G.	Broadley1988	Broadley1988	Broadley1988	Life History Notes. Meizodon semiornatus semiornatus habitat, diet and distribution	Journal of the Herpetological Association of Africa	1988	Journal
Broadley 1991	Broadley, D. G.	Broadley1991	Broadley1991	Broadley1991	A review of the southern African stiletto snakes of the genus Atractaspis A. Smith (Serpentes: Atractaspididae)	Arnoldia Zimbabwe	1991	Museum Publication															X		X
Broadley 1997	Broadley, D. G.	Broadley1997	Broadley1997	Broadley1997	A review of Hemirhagerrhis viperina (Bocage) (Serpentes; Colubridae), a rupicolous Psammophine snake	Madoqua	1997	Museum Publication
Broekhuysen 1959	Broekhuysen, G. J.	Broekhuysen1959	Broekhuysen1959	Broekhuysen1959	The biology of the Cape Sugarbird (Promerops cafer)	Ostrich	1959	Journal
Bruderer 1991	Bruderer, B.	Bruderer1991	Bruderer1991	Bruderer1991	Short Notes: Common egg-eater Dasypeltis scabra killed at Fiscal Shrike Lanius collaris nest	Ostrich	1991	Journal																														X
Bruton & Haacke 1980	Bruton, M. N. and Haacke, W. D.	Bruton&Haacke1980	BrutonHaacke1980	BrutonHaacke1980	The reptiles of Maputaland, pp. 251–287. In: Studies on the Ecology of Maputaland	Rhodes University, Grahamstown	1980	Book																																				X
Bruton 1979	Bruton, M. N.	Bruton1979	Bruton1979	Bruton1979	The amphibians, reptiles, birds and mammals of Lake Sibayi	Monographiae Biologicae	1979	Journal
Butynski & Mattingly 1979	Butynski, T. M. and Mattingly, R.	Butynski&Mattingly1979	ButynskiMattingly1979	ButynskiMattingly1979	Burrow structure and fossorial ecology of the springhare Pedetes capensis in Botswana	African Journal of Ecology	1979	Journal																																X
Calf 2004	Calf, K. M.	Calf2004	Calf2004	Calf2004	Mole snake Pseudaspis cana predation of African Black Oystercatcher Haematopus moquini eggs	Wader Study Group Bulletin	2004	Society Bulletin
Christian 2017	Christian, M.	Christian2017	Christian2017	Christian2017	Breeding of buff-streaked chat, including an eyewitness account of nestling predation by rinkhals	Biodiversity Observations	2017	Society Bulletin																																									X
Colahan 1982	Colahan, B. D.	Colahan1982	Colahan1982	Colahan1982	The biology of the Orangebreasted Waxbill	Ostrich	1982	Journal																														X
Collias & Collias 1971	Collias, N. E. and Collias, E. C.	Collias&Collias1971	ColliasCollias1971	ColliasCollias1971	Ecology and behaviour of the spotted-backed weaverbird in the Kruger National Park	Koedoe	1971	Journal																																				X
Cott 1934	Cott, H. B.	Cott1934	Cott1934	Cott1934	The Zoological Society’s Expedition to the Zambezi, 1927: No. 6. On a collection of snakes from Portuguese east Africa.	Proceedings of the Zoological Society of London	1934	Journal
Cottone & Bauer 2007	Cottone, A. M. and Bauer A. M.	Cottone&Bauer2007	CottoneBauer2007	CottoneBauer2007	Natural History Notes: Psammophis brevirostris (Peters, 1881) diet	African Herp News	2007	Herp. Society Bulletin
Cottone & Bauer 2008	Cottone, A. M. and Bauer A. M.	Cottone&Bauer2008	CottoneBauer2008	CottoneBauer2008	Prey excavation by Psammophylax rhombeatus rhombeatus (Colubridae: Psammophiinae) from South Africa	Herpetological Bulletin	2008	Herp. Society Bulletin
Cottone & Bauer 2010	Cottone, A. M. and Bauer A. M.	Cottone&Bauer2010	CottoneBauer2010	CottoneBauer2010	Sexual dimorphism, diet, reproduction, and their geographic variation in sympatric Psammophiids, Psammophis crucifer and Psammophylax rhombeatus rhombeatus, from Southern Africa	Copeia	2010	Journal
Covas et al. 2008	Covas, R. V., du Plessis, M. A., and Doutrelant, C.	Covasetal.2008	Covasetal.2008	Covas2008	Helpers in colonial cooperatively breeding sociable weavers Philetairus socius contribute to buffer the effects of adverse breeding conditions	Behavioural Ecology and Sociobiology	2008	Journal																																				X
Cunningham & Van der Waal 2010	Cunningham, P. and Van der Waal, C	Cunningham&VanderWaal2010	CunninghamVanderWaal2010	CunninghamVanderWaal2010	Natural History Notes: Naja nigricincta nigricincta (Bogert, 1940) diet	African Herp News	2010	Herp. Society Bulletin
Cunningham 1985	Cunningham, P.	Cunningham1985	Cunningham1985	Cunningham1985	The Tiger-Snake and the bat	African Wildlife	1985	Magazine
Cunningham 2013	Cunningham, P.	Cunningham2013	Cunningham2013	Cunningham2013	Natural History Notes: Psammophis namibensis (Broadley, 1975) predation	African Herp News	2013	Herp. Society Bulletin
De Graaff 1981	De Graaff, G.	DeGraaff1981	DeGraaff1981	DeGraaff1981	The rodents of southern Africa	Butterworths Publishers, Pretoria	1981	Book																																									X
De Waal 1977	De Waal, S. W. P.	DeWaal1977	DeWaal1977	DeWaal1977	The Squamata (Reptilia) of the Orange Free State, South Africa	Department of Zoology, University of Natal, Pietermaritzburg, South Africa	1977	Unpublished Dissertation											X												X					X		X											X
Deans 2011	Deans, R.	Deans2011	Deans2011	Deans2011	Natural History Notes: Causus rhombeatus (Lichtenstein, 1823) diet	African Herp News	2011	Herp. Society Bulletin																									X
Dixon 1966	Dixon, J. E. W.	Dixon1966	Dixon1966	Dixon1966	Notes On the mammals of Ndumu Game Reserve	Lammergeyer	1966	Society Bulletin																												X				X
Douglas 1989	Douglas, R.	Douglas1989	Douglas1989	Douglas1989	Analysis of the Python anchietae faecal sample	Herpetological Review	1989	Herp. Society Bulletin
Douglas 1990	Douglas, R.	Douglas1990	Douglas1990	Douglas1990	Life History Notes: Cacosternum boettgeri feeding, predation and termites	Journal of the Herpetological Association of Africa	1990	Journal
Dyer 1996	Dyer, B. M.	Dyer1996	Dyer1996	Dyer1996	Predation by snakes on seabirds at three South African islands	Journal of Marine Science	1996	Journal																														X
FitzSimons & Brain 1958	FitzSimons, V. F. M. and Brain, C. K.	FitzSimons&Brain1958	FitzSimonsBrain1958	FitzSimonsBrain1958	Serpentes, Colubridae: Calamelaps ventrimaculatus websteri n. subsp	Occasional papers of the National Museums of Southern Rhodesia	1958	Museum Publication																																							X
FitzSimons 1912	FitzSimons, F. W.	FitzSimons1912	FitzSimons1912	FitzSimons1912	The Snakes of South Africa: their Venom and the Treatment of Snake-bite	Maskew Miller. Cape Town.	1912	Book																		X					X		X					X
FitzSimons 1935	FitzSimons, V. F. M.	FitzSimons1935	FitzSimons1935	FitzSimons1935	Notes on a collection of reptiles and amphibians made in the southern Kalahari, Bushmanland and Great and Little Namaqualand	Annals of the Transvaal Museum	1935	Museum Publication																																			X
FitzSimons 1938	FitzSimons, V. F. M.	FitzSimons1938	FitzSimons1938	FitzSimons1938	Transvaal Museum expedition to South-West Africa and Little Namaqualand, May to August 1937	Annals of the Transvaal Museum	1938	Museum Publication
FitzSimons 1939	FitzSimons, V. F. M.	FitzSimons1939	FitzSimons1939	FitzSimons1939	An account of the reptiles and amphibians collected on an expedition to South-eastern Rhodesia during December, 1937, and January, 1938.	Annals of the Transvaal Museum	1939	Museum Publication
FitzSimons 1948	FitzSimons, V. F. M.	FitzSimons1948	FitzSimons1948	FitzSimons1948	Notes on a collection of reptiles and amphibians from the west coast of Southern Africa	Annals of the Transvaal Museum	1948	Museum Publication
FitzSimons 1962	FitzSimons, V. F. M.	FitzSimons1962	FitzSimons1962	FitzSimons1962	Snakes of Southern Africa	Purnell and Sons, LTD. Cape Town.	1962	Book																																							X
Forchhammer 1993	Forchhammer, P.	Forchhammer1993	Forchhammer1993	Forchhammer1993	New records of snakes and insects from Serowe	Botswana Notes and Records	1993	Society Bulletin																																X
Friedl & Klump 1999	Friedl, T. W. and Klump, G. M.	Friedl&Klump1999	FriedlKlump1999	FriedlKlump1999	Determinants of male mating success in the red bishop (Euplectes orix).	Ecology and Sociobiology	1999	Journal
Friedmann 1930	Friedmann, H.	Friedmann1930	Friedmann1930	Friedmann1930	The Sociable Weaver Bird of South Africa	Natural History	1930	Journal																																				X
Fry 1984	Fry, C. H.	Fry1984	Fry1984	Fry1984	The Bee-eaters	Russel Friedman Book Enterprises, South Africa	1984	Book																														X
Glaudas et al. 2017	Glaudas, X., Kearney, T. C., and Alexander, G. J.	Glaudasetal.2017	Glaudasetal.2017	Glaudas2017	Museum specimen bias measures of snake diet: case study using ambush-foraging Puff Adders (Bitis arietans).	Herpetologica	2017	Journal																		X
Greene 1997	Greene, H. W.	Greene1997	Greene1997	Greene1997	Snakes: The evolution of mystery in nature	University of California Press, Berkeley, California	1997	Book															X
Haacke & Bruton 1978	Haacke, M. N. and Bruton, W. D.	Haacke&Bruton1978	HaackeBruton1978	HaackeBruton1978	On two little known snakes from the tropical subtraction zone of south-eastern Africa	Annals of the Transvaal Museum	1978	Museum Publication
Haacke 1975	Haacke, W. D.	Haacke1975	Haacke1975	Haacke1975	Description of a new adder (Viperidae, Reptilia) from southern Africa, with a discussion of related forms	Cimbebasia Ser A	1975	Museum Publication																						X
Haacke 1981	Haacke, W. D.	Haacke1981	Haacke1981	Haacke1981	The file-snake of the genus Mehelya in southern Africa with special reference to South West Africa/Namibia	Madoqua	1981	Museum Publication																																								X
Haagner & Branch 1993	Haagner, G. V. and Branch, W. R	Haagner&Branch1993	HaagnerBranch1993	HaagnerBranch1993	Life History Notes: Psammophis crucifer diet	Journal of the Herpetological Association of Africa	1993	Journal
Haagner & Branch 1993	Haagner, G. V. and Branch, W. R	Haagner&Branch1993	HaagnerBranch1993	HaagnerBranch1993	Notes on predation on some Cape dwarf chameleons	The Chameleon	1993	Herp. Society Bulletin																												X
Haagner & Branch 1995	Haagner, G. V. and Branch, W. R	Haagner&Branch1995	HaagnerBranch1995	HaagnerBranch1995	Natural History Notes: Philothamnus natalensis occidentalis diet	African Herp News	1995	Herp. Society Bulletin
Haagner & Branch 1996	Haagner, G. V. and Branch, W. R	Haagner&Branch1996	HaagnerBranch1996	HaagnerBranch1996	Natural History Notes: Naja nivea ophiophagy	African Herp News	1996	Herp. Society Bulletin
Haagner & Clarke 1992	Haagner, G. V. and Clarke, C. H	Haagner&Clarke1992	HaagnerClarke1992	HaagnerClarke1992	Life History Notes: Thelotornis capensis capensis ophiophagy	Journal of the Herpetological Association of Africa	1992	Journal
Haagner & Hall 1992	Haagner, G. V. and Hall, R. J.	Haagner&Hall1992	HaagnerHall1992	HaagnerHall1992	Life History Notes: Lycophidion capense capense diet and reproduction	Journal of the Herpetological Association of Africa	1992	Journal
Haagner & Morgan 1992	Haagner, G. V. and Morgan, D. R.	Haagner&Morgan1992	HaagnerMorgan1992	HaagnerMorgan1992	Captive biology of the shield-nosed snake (Aspidelaps scutatus intermedius)	Journal of the Herpetological Association of Africa	1992	Journal														X
Haagner & Reynolds 1988	Haagner, G. V. and Reynolds, D. S.	Haagner&Reynolds1988	HaagnerReynolds1988	HaagnerReynolds1988	Notes on the nesting of the African crake at Manyeleti Game Reserve, eastern Transvaal	Ostrich	1988	Journal																																				X
Haagner 1986	Haagner, G. V.	Haagner1986	Haagner1986	Haagner1986	Notes on the diet of the Gaboon Viper	Lammergeyer	1986	Society Bulletin																					X
Haagner 1990	Haagner, G. V.	Haagner1990	Haagner1990	Haagner1990	Life History Notes: Psammophis phillipsii ophiophagy	Journal of the Herpetological Association of Africa	1990	Journal
Haagner 1990	Haagner, G. V.	Haagner1990	Haagner1990	Haagner1990	Life History Notes: Dispholidus typus typus ophiophagy	Journal of the Herpetological Association of Africa	1990	Journal																																				X
Haagner 1990	Haagner, G. V.	Haagner1990	Haagner1990	Haagner1990	Life History Notes: Naja haje annulifera ophiophagy	Journal of the Herpetological Association of Africa	1990	Journal
Haagner 1991	Haagner, G. V.	Haagner1991	Haagner1991	Haagner1991	Life History Notes: Aspidelaps scutatus diet and reproduction	Journal of the Herpetological Association of Africa	1991	Journal														X
Haagner 1993	Haagner, G. V.	Haagner1993	Haagner1993	Haagner1993	Life History Notes: Naja annulifera diet	Journal of the Herpetological Association of Africa	1993	Journal
Haagner 1995	Haagner, G. V.	Haagner1995	Haagner1995	Haagner1995	Natural History Notes: Philothamnus angolensis diet	Journal of the Herpetological Association of Africa	1995	Journal
Haagner 1999	Haagner, G. V.	Haagner1999	Haagner1999	Haagner1999	Natural History Notes: Lycophidion capense capense diet	African Herp News	1999	Herp. Society Bulletin
Haagner 1999	Haagner, G. V.	Haagner1999	Haagner1999	Haagner1999	Natural History Notes: Dendroaspis polylepis diet	African Herp News	1999	Herp. Society Bulletin																																X
Halliday & Adler 1986	Halliday, T. and Adler, K.	Halliday&Adler1986	HallidayAdler1986	HallidayAdler1986	The encyclopedia of reptiles of reptiles and amphibians	George Allen And Unquin Publishers, Oxford.	1986	Book
Hampton 2010	Hampton, P. M.	Hampton2010	Hampton2010	Hampton2010	Causus rhombeatus (Rhombic Night Adder). Prey Size	Herpetological Review	2010	Herp. Society Bulletin																									X
Hedman et al. 2014	Hedman, H. D., Alvarez, H. M., Kalifeni Hanghome, G. P., Eifler, M., and Eifler, D.	Hedmanetal.2014	Hedmanetal.2014	Hedman2014	Reptiles of the Gobabeb Research and Training Centre	IRCF Reptiles and Amphibians	2014	Herp. Society Bulletin
Hewitt 1913	Hewitt, J. and Power, H.	Hewitt1913	Hewitt1913	Hewitt1913	A list of South African Lacertilia, Ophidia, and Batrachia in the McGregor Museum, Kimberley; with field-notes on various species	Transactions of the Royal Society of South Africa	1913	Journal																							X
Hewitt 1911	Hewitt, J.	Hewitt1911	Hewitt1911	Hewitt1911	Records of the South African Lacertilia and Amphibia: addenda and corrigenda		1911	Museum Publication
Hockey et al. 2005	Hockey, P. A. R., Dean, W. R. J., and Ryan, P. G.	Hockeyetal.2005	Hockeyetal.2005	Hockey2005	Roberts birds of Southern Africa	John Voelcker Bird Book Fund, Cape Town, South Africa.	2005	Book																							X							X						X
Hoesch & Niethammer 1940	Hoesch, W. and Niethammer, G	Hoesch&Niethammer1940	HoeschNiethammer1940	HoeschNiethammer1940	Die Vogelwelt Deutsch-Südwestafrikas: namentlich des Damara- und Namalandes. Journal für Ornithologie	Journal für Ornithologie	1940	Journal																																				X
Hoevers & Johnson 1982	Hoevers, L. G. and Johnson, P. M.	Hoevers&Johnson1982	HoeversJohnson1982	HoeversJohnson1982	Notes on a collection of snakes from the middle Juba Region, Somalia	Monitore Zoologico Italiano	1982	Journal
Hoffman 1987	Hoffman, L.	Hoffman1987	Hoffman1987	Hoffman1987	Notes on snakes from Gobabeb, Namib-Naukluft park	Journal of the Herpetological Association of Africa	1987	Journal
Hoffman 1989	Hoffman, L.	Hoffman1989	Hoffman1989	Hoffman1989	An annotated list of amphibian and reptile observations from the Etosha National Park	Madoqua	1989	Museum Publication																																				X
Hofmeyr et al 2017	Hofmeyr, S. D., Burman, M. S., Hofmeyr, S. B., and Hofmeyr, C. E.	Hofmeyretal2017	Hofmeyretal2017	Hofmeyretal2017	Dispholidus typus robs Cape Weaver Ploceus capensis nest	Biodiversity Observations	2017	Society Bulletin																																				X
Ionides & Pitman 1965	Ionides, C. J. P. and Pitman, C. R. S.	Ionides&Pitman1965	IonidesPitman1965	IonidesPitman1965	Notes on three East African venomous snake populations	The Puku	1965	Society Bulletin																					X										X
Ionides 1954	Ionides, C. J. P.	Ionides1954	Ionides1954	Ionides1954	Nature notes on Bibron’s Burrowing Viper (Atractaspis bibronii rostrata) in south-east Tanganyika Territory	African Wildlife	1954	Magazine															X
Jacobsen 1977	Jacobsen N. H. G.	Jacobsen1977	Jacobsen1977	Jacobsen1977	An annotated checklist of the amphibians, reptiles and mammals of the Nylsvley Nature Reserve	Council for Scientific and Industrial Research, Pretoria	1977	Government Report
Jacobsen 1982	Jacobsen N. H. G.	Jacobsen1982	Jacobsen1982	Jacobsen1982	Ecology of the reptiles and amphibians in the Burkana africana - Eragnostris pallens savanna of the Nylsvley Nature Reserve	Department of Zoology, University of Pretoria, Pretoria, South Africa	1982	Unpublished Dissertation															X			X										X				X
Jacobsen 1989	Jacobsen N. H. G.	Jacobsen1989	Jacobsen1989	Jacobsen1989	A herpetological survey of the Transvaal	Department of Zoology, University of Natal, Pietermaritzburg, South Africa	1989	Unpublished Dissertation								X							X								X		X					X		X				X					X
Jacobsen 1990	Jacobsen, N. H. G., Newbery, R. E., and Peterson, W.	Jacobsen1990	Jacobsen1990	Jacobsen1990	On the ecology and conservation status of Cordylus giganteus A. Smith in the Transvaal	South African Journal of Zoology	1990	Journal																																									X
Jenkins 1994	Jenkins, A.	Jenkins1994	Jenkins1994	Jenkins1994	Caught in the act: mamba attack on peregrine brood	African Wildlife	1994	Magazine																																X
Jennings 1994	Jennings, P. E.	Jennings1994	Jennings1994	Jennings1994	Amblyodipsas polylepis polylepis (purple-glossed snake) diet	African Herp News	1994	Herp. Society Bulletin								X
Keogh et al 2000	Keogh, J. S., Branch, W. R. and Shine, R.	Keoghetal2000	Keoghetal2000	Keoghetal2000	Feeding ecology, reproduction and sexual dimorphism in the colubrid snake Crotaphopeltis hotamboeia in southern Africa	African Journal of Herpetology	2000	Journal																												X
Kok et al. 1977	Kok, O. B., Roos, M. M., and Roos, Z. N.	Koketal.1977	Koketal.1977	Kok1977	Broeisukses van Rooivinke in die Willem Pretorius-Wildtuin	Acta Academica B	1977	Journal																														X
Krüger 2004	Krüger, O.	Krüger2004	Krüger2004	Krüger2004	Breeding biology of the Cape Bulbul Pycnonotus capensis: a 40-year comparison	Ostrich	2004	Journal																														X
Layloo et al. 2017	Layloo, I., Smith, C., and Maritz, B.	Laylooetal.2017	Laylooetal.2017	Layloo2017	Diet and feeding in the Cape cobra Naja nivea	African Journal of Herpetology	2017	Journal
Linn et al. 2006	Linn, I. J., Perrin M. R., and Bodbijl, T.	Linnetal.2006	Linnetal.2006	Linn2006	Movements and home range of the gaboon adder, Bitis gabonica gabonica, in Zululand, South Africa	African Zoology	2006	Journal																					X
Little & Crowe 1993	Little, R. M. and Crowe, T. M.	Little&Crowe1993	LittleCrowe1993	LittleCrowe1993	The breeding biology of the greywing francolin Francolinus africanus and its implications for hunting and management	South African Journal of Zoology	1993	Journal																														X
Lloyd 1974	Lloyd, C. N. V.	Lloyd1974	Lloyd1974	Lloyd1974	Feeding behaviour in the Green Mamba, Dendroaspis angusticeps (A. Smith)	Journal of the Herpetological Association of Africa	1974	Journal																															X
Lloyd 2004	Lloyd, P.	Lloyd2004	Lloyd2004	Lloyd2004	Variation in nest predation among arid-zone birds	Ostrich	2004	Journal																														X
Lloyd et al. 2001	Lloyd, P., Little, R. M., and Crowe, T. M.	Lloydetal.2001	Lloydetal.2001	Lloyd2001	The breeding biology of the Namaqua Sandgrouse, Pterocles namaqua	Journal of African Ornithology	2001	Journal																														X
Loehr 2005	Loehr, V. J. T.	Loehr2005	Loehr2005	Loehr2005	Natural History Notes: Naja nigricollis woodi (Pringle, 1955) scavenging	African Herp News	2005	Herp. Society Bulletin
Loveridge 1923	Loveridge, A.	Loveridge1923	Loveridge1923	Loveridge1923	Notes on East African snakes collected 1918–1923	Proceedings of the Zoological Society of London	1923	Journal																		X																		X
Loveridge 1933	Loveridge, A.	Loveridge1933	Loveridge1933	Loveridge1933	Reports on the scientific results of an expedition to the southwestern highlands of Tanganyika Territory. VII Herpetology	Bulletin of the Museum of Comparative Zoology	1933	Museum Publication			X															X			X							X								X
Loveridge 1936	Loveridge, A.	Loveridge1936	Loveridge1936	Loveridge1936	Scientific results of an expedition to rain forest regions in Eastern Africa. V. Reptiles	Bulletin of the Museum of Comparative Zoology	1936	Museum Publication															X			X										X		X						X
Loveridge 1937	Loveridge, A.	Loveridge1937	Loveridge1937	Loveridge1937	Zoological Results of the George Vanderbilt African Expedition of 1934. Part VII: Reptiles and Amphibians	Proceedings of the Academy of Natural Sciences of Philadelphia	1937	Journal
Loveridge 1942	Loveridge, A.	Loveridge1942	Loveridge1942	Loveridge1942	Scientific results of a fourth expedition to forested areas in East and Central Africa. IV. Reptiles.	Bulletin of the Museum of Comparative Zoology	1942	Museum Publication															X						X							X
Loveridge 1951	Loveridge, A.	Loveridge1951	Loveridge1951	Loveridge1951	On reptiles and amphibians from Tanganyika Territory collected by C. J. Ionides	Bulletin of the Museum of Comparative Zoology	1951	Museum Publication												X			X
Loveridge 1953	Loveridge, A.	Loveridge1953	Loveridge1953	Loveridge1953	Zoological results of a fifth expedition to east Africa III Reptiles from Nyasaland and Tete	Bulletin of the Museum of Comparative Zoology at Harvard College	1953	Museum Publication				X														X					X		X			X		X						X
Loveridge 1955	Loveridge, A.	Loveridge1955	Loveridge1955	Loveridge1955	On a second collection of reptiles and amphibians taken in Tanganyika Territory by C. J. P. Ionides, Esq	Journal of East Africa Natural History Society	1955	Journal															X			X							X								X
Loveridge 1959	Loveridge, A.	Loveridge1959	Loveridge1959	Loveridge1959	On a fourth collection of reptiles, mostly taken in Tanganyika Territory by Mr. C. J. P. Ionides	Proceedings of the Zoological Society of London	1959	Journal																					X																		X	X
MacDonald et al. 1978	MacDonald, W. R. J. and Dean, I. A. W.	MacDonaldetal.1978	MacDonaldetal.1978	MacDonald1978	A record of egg predation by the east African egg-eater Dasypeltis medici	African Zoology	1978	Journal																													X
Mackie 1994	Mackie, C.	Mackie1994	Mackie1994	Mackie1994	Naja haje annulifera (Egyptian cobra) diet	African Herp News	1994	Herp. Society Bulletin
Maclean 1973	Maclean, G. L.	Maclean1973	Maclean1973	Maclean1973	The Sociable Weaver, Part 4: Predators, parasites and symbionts	Ostrich	1973	Journal
Manaças 1959	Manaças, S.	Manaças1959	Manaças1959	Manaças1959	Estudos de Zoologia	Ofídios de Moçambique. Memórias da Junta de Investigações do Ultramar	1959	Museum Publication																																				X
Marais 1993	Marais, J.	Marais1993	Marais1993	Marais1993	Dangerous and not so dangerous snakes	African Herp News	1993	Herp. Society Bulletin
Marais 2010	Marais, J.	Marais2010	Marais2010	Marais2010	Natural History Notes: Atractaspis bibronii (Smith, 1849) Bibron’s Stiletto Snake Diet	African Herp News	2010	Herp. Society Bulletin															X
Maritz & Alexander 2014	Maritz, B. and Alexander, G. J.	Maritz&Alexander2014	MaritzAlexander2014	MaritzAlexander2014	Namaqua Dwarf Adders are generalist predators	African Journal of Herpetology	2014	Journal																						X
Maritz 2007	Maritz, B.	Maritz2007	Maritz2007	Maritz2007	Mehelya nyassae (Black File Snake). Feeding.	Herpetological Review	2007	Herp. Society Bulletin																																								X
Maritz 2012	Maritz, B.	Maritz2012	Maritz2012	Maritz2012	Natural History Notes: Bitis arietans arietans (Merrem, 1820) predation	African Herp News	2012	Herp. Society Bulletin
Mertens 1937	Mertens, R.	Mertens1937	Mertens1937	Mertens1937	Reptilien und amphibian aus dem südlichen Inner-Afrika	Abhandlungen der Senckenbergischen Naturforschenden Gesellschaft	1937	Museum Publication															X
Mertens 1954	Mertens, R.	Mertens1954	Mertens1954	Mertens1954	Die Amphibien und Reptilien Südwestafrikas. Aus den Ergebnissen einer im Jahre 1952 ausgefuhrten Reise.	Abhandlungen der Senckenbergischen Naturforschenden Gesellschaft	1954	Museum Publication
Miller 2009	Miller, A. K.	Miller2009	Miller2009	Miller2009	Natural History Notes: Prosymna stuhlmannii (Pfeffer, 1893) diet	African Herp News	2009	Herp. Society Bulletin
Nalwanga et al. 2004	Nalwanga, D., Lloyd, P., du Plessis, M. A., and Martin, T. E	Nalwangaetal.2004	Nalwangaetal.2004	Nalwanga2004	The influence of nest-site characteristics on the nesting success of the Karoo Prinia (Prinia maculosa)	Ostrich	2004	Journal																														X						X
Newman 1963	Newman, A. C.	Newman1963	Newman1963	Newman1963	Some miscellaneous observations from Umtali Snake Park	Journal of the Herpetological Association of Rhodesia	1963	Journal
Newman 1965	Newman, A. C.	Newman1965	Newman1965	Newman1965	Further observations from the Umtali Snake Park.	Journal of the Herpetological Association of Rhodesia	1965	Journal
Parusnath 2012	Parusnath, S.	Parusnath2012	Parusnath2012	Parusnath2012	Natural History Notes: Smaug giganteus (Smith, 1844) predation	African Herp News	2012	Herp. Society Bulletin																																									X
Parusnath 2013	Parusnath, S.	Parusnath2013	Parusnath2013	Parusnath2013	Natural History Notes: Hemachatus haemachatus (Rinkhals) diet / cannibalism	Herpetological Review	2013	Herp. Society Bulletin																																									X
Pauwels 2000	Pauwels O. S. G.	Pauwels2000	Pauwels2000	Pauwels2000	Natural History Notes: Naja mossambica (Peters, 1854) diet	African Herp News	2000	Herp. Society Bulletin																												X
Pernetta & Dell 2012	Pernetta, A. P. and Dell, M. C. P.	Pernetta&Dell2012	PernettaDell2012	PernettaDell2012	Predation of a cape genet (Genetta tigrina, Schreber 1776) by a southern African python (Python natalensis, Smith 1840)	Herpetology Notes	2012	Herp. Society Bulletin
Perrin & Bodbijl 2001	Perrin, M. R. and Bodbijl, T.	Perrin&Bodbijl2001	PerrinBodbijl2001	PerrinBodbijl2001	Diet and prey selection of the Gaboon adder in Zululand (KwaZulu-Natal), South Africa	South African Journal of Wildlife Research	2001	Journal																					X
Peters 1882	Peters, W. C. H.	Peters1882	Peters1882	Peters1882	Naturwissenschaftliche reise nach Mossambique. III Amphibien	George Reimer, Berlin	1882	Book																					X
Petford et al. 2018	Petford, M., Van Huyssteen, R., and G. K. Nicolau	Petfordetal.2018	Petfordetal.2018	Petford2018	Natural History Notes: Bitis arietans arietans foraging strategy	African Herp News	2018	Herp. Society Bulletin																		X
Phelps 2007	Phelps, T.	Phelps2007	Phelps2007	Phelps2007	Observations of the Cape cobra, Naja nivea (Serpentes: Elapidae) in the DeHoop Nature Reserve, Western Cape Province, South Africa	Herpetological Bulletin	2007	Herp. Society Bulletin
Phillips et al. 2012	Phillips, M. A., Waterman, J. M., Plessis, P. G., Smit, M., and Bennet, N. C.	Phillipsetal.2012	Phillipsetal.2012	Phillips2012	No evidence for proteolytic venom resistance in southern African ground squirrels	Toxicon	2012	Journal																		X
Pienaar 1969	Pienaar, U. de V.	Pienaar1969	Pienaar1969	Pienaar1969	Observations on the nesting habits and predators of breeding colonies of red-billed Queleas Quelea quelea lathami (A. Smith) in the Kruger National Park	Bokmakierie	1969	Society Bulletin																														X	X
Pienaar 1978	Pienaar, U. de V.	Pienaar1978	Pienaar1978	Pienaar1978	The Reptile fauna of the Kruger National Park. National Parks Board of South Africa	National Parks Board of South Africa, Pretoria	1978	Book
Pike 1964	Pike, R.	Pike1964	Pike1964	Pike1964	Poisonous snakes ..Some notes on the many reptiles found in the Lake Bangweulu District	Black Lechwe	1964	Society Bulletin																					X
Pitman 1958	Pitman, C. R. S.	Pitman1958	Pitman1958	Pitman1958	Snake and lizard predators of birds. Part I.	Bulletin of British Ornithologists’ Club	1958	Society Bulletin																																				X
Pitman 1958	Pitman, C. R. S.	Pitman1958	Pitman1958	Pitman1958	Snake and lizard predators of birds. Part II.	Bulletin of British Ornithologists’ Club	1958	Society Bulletin																		X																							X
Pitman 1958	Pitman, C. R. S.	Pitman1958	Pitman1958	Pitman1958	Snake and lizard predators of birds. Part III	Bulletin of British Ornithologists’ Club	1958	Society Bulletin																												X
Pitman 1962	Pitman, C. R. S.	Pitman1962	Pitman1962	Pitman1962	More snake and lizard predators of birds. Part I.	Bulletin of British Ornithologists’ Club	1962	Society Bulletin																		X			X									X	X	X				X
Pitman 1962	Pitman, C. R. S.	Pitman1962	Pitman1962	Pitman1962	More snake and lizard predators of birds. Part II.	Bulletin of British Ornithologists’ Club	1962	Society Bulletin
Pitman 1974	Pitman, C. R. S.	Pitman1974	Pitman1974	Pitman1974	A guide to the snakes of Uganda	Wheldon & Wesley, Ltd	1974	Book
Pryke & Lawes 2004	Pryke, S. R. and Lawes, M.	Pryke&Lawes2004	PrykeLawes2004	PrykeLawes2004	Female nest dispersion and breeding biology of polygynous red-collared widowbirds (Euplectes ardens)	The Auk	2004	Journal																														X
Raw 1973	Raw, L. R. G.	Raw1973	Raw1973	Raw1973	A review of the dusky-bellied water snake, Lycodonomorphus laevissimus (Günther), with descriptions of two new subspecies	Annals of the Natal Museum	1973	Museum Publication
Reissig et al. 2019	Reissig, J., Tiedemann, C. A., Malan, J., and Boshoff, D.	Reissigetal.2019	Reissigetal.2019	Reissig2019	Crotaphopeltis hotamboeia (Laurenti, 1768)	African Herp News	2019	Herp. Society Bulletin																												X
Reissig 2013	Reissig, J.	Reissig2013	Reissig2013	Reissig2013	Thelotornis capensis capensis (A. Smith, 1849)	African Herp News	2013	Herp. Society Bulletin
Rose 1954	Rose, W.	Rose1954	Rose1954	Rose1954	Notes on the feeding habits of snakes	Herpetologica	1954	Journal																														X						X					X
Rose 1955	Rose, W.	Rose1955	Rose1955	Rose1955	Snakes: Mainly South African	Maskew Miller, Cape Town	1955	Book
Rowan & Broekhuysen 1962	Rowan, M. K. and Broekhuysen, G. J.	Rowan&Broekhuysen1962	RowanBroekhuysen1962	RowanBroekhuysen1962	A study of the karoo prinia	Ostrich	1962	Journal																														X
Rowan 1983	Rowan, M. K.	Rowan1983	Rowan1983	Rowan1983	The Doves, Parrots, Louries & Cuckoos of Southern Africa	David Philip, Cape Town	1983	Book																														X
Schmidt 1999	Schmidt, W.	Schmidt1999	Schmidt1999	Schmidt1999	Natural History Notes: Crotaphopeltis hotamboeia diet	African Herp News	1999	Herp. Society Bulletin																												X
Schmidt 2002	Schmidt, W.	Schmidt2002	Schmidt2002	Schmidt2002	Short Communications: The herpetofauna of Sun City, North West Province, South Africa	African Herp News	2002	Herp. Society Bulletin																												X
Schmidt 2011	Schmidt, W.	Schmidt2011	Schmidt2011	Schmidt2011	Natural History Notes: Lycodonomorphus rufulus (Lichtenstein, 1823) diet	African Herp News	2011	Herp. Society Bulletin
Schönland 1895	Schönland, J.	Schönland1895	Schönland1895	Schönland1895	Snake Cannibalism	Nature	1895	Journal																																									X
Schultz & Massyn 2008	Schultz, D. and Massyn, D.	Schultz&Massyn2008	SchultzMassyn2008	SchultzMassyn2008	Natural History Notes: Naja mossambica (Peters, 1854) cannibalism	African Herp News	2008	Herp. Society Bulletin
Selman et al. 2000	Selman, R. G., Hunter, M. L., and Perrin, M. R.	Selmanetal.2000	Selmanetal.2000	Selman2000	Ruppell’s Parrot: status, ecology, and conservation biology	Ostrich	2000	Journal																																				X
Shine et al. 1996	Shine, R. Harlow, P. S., Branch, W. R., and Webb, J. K.	Shineetal.1996	Shineetal.1996	Shine1996	Life on the lowest branch: Sexual dimorphism, diet, and reproductive biology of an African twig snake, Thelotornis capensis (Serpentes, Colubridae).	Copeia	1996	Journal
Shine et al. 1996	Shine, R., Branch, W. R., Harlow, P. S., and Webb, J. K.	Shineetal.1996	Shineetal.1996	Shine1996	Sexual dimorphism, reproductive biology, and food habits of two species of African filesnakes (Mehelya, Colubridae)	Journal of Zoology	1996	Journal																																								X
Shine et al. 1996	Shine, R., Haagner, G. V., Branch, W. R., Harlow, P. S., and Webb, J. K.	Shineetal.1996	Shineetal.1996	Shine1996	Natural history of the African shieldnose snake Aspidelaps scutatus (Serpentes, Elapidae)	Journal of Herpetology	1996	Journal														X
Shine et al. 1998	Shine, R., Branch, W. R., Harlow, P. S., and Webb, J. K.	Shineetal.1998	Shineetal.1998	Shine1998	Reproductive biology and food habits of horned adders, Bitis caudalis (Viperidae), from southern Africa	Copeia	1998	Journal																				X
Shine et al. 2006	Shine, R., Branch, W. R., Webb, J. K., Harlow, P. S., and Shine, T	Shineetal.2006	Shineetal.2006	Shine2006	Sexual dimorphism, reproductive biology, and dietary habits of psammophiine snakes (Colubridae) from southern Africa	Copeia	2006	Journal
Shine et al. 2006	Shine, R., Branch, W. R., Harlow, P. S., Webb, J. K., and Shine, T.	Shineetal.2006	Shineetal.2006	Shine2006	Biology of Burrowing Asps (Atractaspididae) from Southern Africa	Copeia	2006	Journal								X							X
Shine et al. 2007	Shine, R., Branch, W. R., Webb, J. K., Harlow, P. S., Shine, T., and Keogh, J. S.	Shineetal.2007	Shineetal.2007	Shine2007	Ecology of cobras from southern Africa	Journal of Zoology	2007	Journal													X																												X
Skead 1947	Skead, C. J.	Skead1947	Skead1947	Skead1947	A study of the Cape weaver	Ostrich	1947	Journal																																				X
Skead 1950	Skead, C. J.	Skead1950	Skead1950	Skead1950	A study of the African hoopoe	Ibis	1950	Journal
Smith et al. 2019	Smith, C. C. D, Layloo, I., Maritz, R., and Maritz, B.	Smithetal.2019	Smithetal.2019	Smith2019	Sexual dichromatism does not translate into sex-based difference in morphology or diet for the African boomslang	Journal of Zoology	2019	Journal																																				X
Stewart & Wilson 1966	Stewart, M. M. and Wilson, V. J.	Stewart&Wilson1966	StewartWilson1966	StewartWilson1966	Herpetofauna of the Nyika Plateau (Malawi and Zambia)	Annals of the Natal Museum	1966	Museum Publication
Steyn and Els 1963	Steyn, W. and Els, A.	SteynandEls1963	SteynandEls1963	SteynandEls1963	Python anchietae Bocage: A note on prey capture and diet	Cimbebasia	1963	Museum Publication
Stuart 1976	Stuart, C. T.	Stuart1976	Stuart1976	Stuart1976	A note on Pythonodipsas carinata Günther (Western keeled snake) in South West Africa, with new distribution records	Madoqua	1976	Museum Publication
Swartz 2004	Swartz, E.	Swartz2004	Swartz2004	Swartz2004	Natural History Notes: Crotaphopeltis hotamboeia aquatic feeding	African Herp News	2004	Herp. Society Bulletin																												X
Taft et al. 2017	Taft, J. M., Greuel, J., and Maritz, B.	Taftetal.2017	Taftetal.2017	Taft2017	Natural History Notes: Lamprophis guttatus diet	African Herp News	2017	Herp. Society Bulletin
Thomas 1985	Thomas, I.	Thomas1985	Thomas1985	Thomas1985	...and a Rock Python kills and Green-spotted Dove.	African Wildlife	1985	Magazine
Tonge & Morgan 1984	Tonge, S. and Morgan, D.	Tonge&Morgan1984	TongeMorgan1984	TongeMorgan1984	Notes on the herpetofauna of Southern Malawi	Herpetological Society Bulletin	1984	Herp. Society Bulletin																																X
Underhill et al. 2009	Underhill, L. G., Sherley, R. B., Dyer, B. M., and Crawford, R. J. M.	Underhilletal.2009	Underhilletal.2009	Underhill2009	Interactions between snakes and seabirds on Robben, Schaapen and Meeuw Islands, Western Cape province South Africa	Ostrich	2009	Journal																														X
Van Bruggen & Appleton 1977	Van Bruggen, A. C., and Appleton, C. C.	VanBruggen&Appleton1977	VanBruggenAppleton1977	VanBruggenAppleton1977	Studies on the ecology and systematics of the terrestrial molluscs of the Lake Sibaya area of Zululand, South Africa	Zoologische Verhandelingen	1977	Journal																																					X
Van Wyk & Rautenbach 2005	Van Wyk, J. and Rautenbach, I. L.	VanWyk&Rautenbach2005	VanWykRautenbach2005	VanWykRautenbach2005	Natural History Notes: Lamprophis capensis (Dumeril & Bibron, 1854) diet	African Herp News	2005	Herp. Society Bulletin																							X
Van Wyk 1988	Van Wyk, J. H.	VanWyk1988	VanWyk1988	VanWyk1988	The diet of the rhombic skaapsteker, Psammophylax r. rhombeatus.	Navorsinge van die Nasionale Museum: Researches of the National Museum	1988	Museum Publication
Van Wyk 2001	Van Wyk, J. H.	VanWyk2001	VanWyk2001	VanWyk2001	Natural History Notes: Naja mossambica diet	African Herp News	2001	Herp. Society Bulletin
Visser 2012	Visser, J.	Visser2012	Visser2012	Visser2012	Geographical Distributions: Gonionotophis nyassae (Gunther, 1888)	African Herp News	2012	Herp. Society Bulletin																																								X
Ward 1989	Ward, D.	Ward1989	Ward1989	Ward1989	Behaviour associated with breeding of Crowned, Blackwinged and Lesser blackwinged plovers.	Ostrich	1989	Journal																														X
Warner & Burden 2011	Warner, J. K. and Burden, G. M.	Warner&Burden2011	WarnerBurden2011	WarnerBurden2011	Dipsadoboa aulica (Marbled Tree Snake) Diet	Herpetological Review	2011	Herp. Society Bulletin																																	X
Warner 2009	Warner, J. K.	Warner2009	Warner2009	Warner2009	Conservation biology of the gaboon adder (Bitis gabonica) in South Africa	School of Animal, Plant and Environmental Sciences, University of Witwatersrand, Johannesburg, South Africa	2009	Unpublished Dissertation																					X
Warner 2011	Warner, J. K.	Warner2011	Warner2011	Warner2011	Naja melanoleuca (Forest Cobra) Diet and Foraging	Herpetological Review	2011	Herp. Society Bulletin
Webb et al. 2000	Webb, J. K., Shine R., Branch W. R., and Harlow P. S.	Webbetal.2000	Webbetal.2000	Webb2000	Life-history strategies in basal snakes: reproduction and dietary habits of the African thread snake Leptotyphlops scutifrons (Serpentes: Leptotyphlopidae)	Journal of Herptology	2000	Journal
Webb et al. 2001	Webb, J. K., Branch, W. R., and Shine, R.	Webbetal.2001	Webbetal.2001	Webb2001	Dietary habits and reproductive biology of typhlopid snakes from southern Africa	Journal of Herptology	2001	Journal	X	X	X		X
Wessels & Maritz 2009	Wessels, B. R. and Maritz, B.	Wessels&Maritz2009	WesselsMaritz2009	WesselsMaritz2009	Bitis schneideri feeding	Herpetological Review	2009	Herp. Society Bulletin																						X
Wilson 1965	Wilson, V. J.	Wilson1965	Wilson1965	Wilson1965	The snakes of the Eastern Province of Zambia	The Puku	1965	Society Bulletin															X													X				X				X				X
Witberg 2011	Witberg, M.	Witberg2011	Witberg2011	Witberg2011	Natural History Notes: Naja nivea juvenile coloration	African Herp News	2011	Herp. Society Bulletin
Yeadon 1997	Yeadon, R. B.	Yeadon1997	Yeadon1997	Yeadon1997	Natural History Notes: Macrelaps microlepidotus feeding behaviour	African Herp News	1997	Herp. Society Bulletin
[truncated: 68 more columns]
